# Supplementary material for: Do Superstitious Traders Lose Money?
Source: Atypon-hosted journal article supplement (doi:10.1287/mnsc.2016.2701), 2017-04-07

# **Do Superstitious Traders Lose Money?**

## **The APPENDIX**

**Utpal Bhattacharya**

**Wei-Yu Kuo**

**Tse-Chun Lin**

**Jing Zhao**

**Table AI. Descriptive Statistics of the Superstition Index**

In this table, we report the summary statistics of the investor-level superstition index. In each year, we calculate the superstition index for each investor as the difference between limit order submission ratios at “8” and “4.” The submission ratio at “8” of an investor is calculated as the number of limit orders submitted at prices ending with “8” divided by the total number of limit orders submitted at all prices within a year. The submission ratio at “4” is calculated in a similar fashion. To ensure a reasonable magnitude of the superstition index, we require that investors submit at least 10 limit orders in each of two consecutive years. In 2008, we only have data for the first nine months.

## Panel A: Individual Investors

| Year | Mean   | Median | Standard Deviation | 20th Percentile | 40th Percentile | 60th Percentile | 80th Percentile |
|------|--------|--------|--------------------|-----------------|-----------------|-----------------|-----------------|
| 2003 | 0.0365 | 0.0292 | 0.0764             | 0.0000          | 0.0152          | 0.0435          | 0.0805          |
| 2004 | 0.0408 | 0.0323 | 0.0799             | 0.0000          | 0.0185          | 0.0462          | 0.0833          |
| 2005 | 0.0413 | 0.0323 | 0.0848             | 0.0000          | 0.0172          | 0.0476          | 0.0889          |
| 2006 | 0.0425 | 0.0324 | 0.0836             | 0.0000          | 0.0189          | 0.0465          | 0.0857          |
| 2007 | 0.0424 | 0.0303 | 0.0855             | 0.0000          | 0.0175          | 0.0439          | 0.0833          |
| 2008 | 0.0493 | 0.0333 | 0.0909             | 0.0000          | 0.0213          | 0.0474          | 0.0882          |

## Panel B: Domestic Institutions

| Year | Mean   | Median | Standard Deviation | 20th Percentile | 40th Percentile | 60th Percentile | 80th Percentile |
|------|--------|--------|--------------------|-----------------|-----------------|-----------------|-----------------|
| 2003 | 0.0273 | 0.0158 | 0.0820             | -0.0187         | 0.0000          | 0.0321          | 0.0690          |
| 2004 | 0.0359 | 0.0241 | 0.0828             | -0.0083         | 0.0124          | 0.0364          | 0.0667          |
| 2005 | 0.0285 | 0.0223 | 0.0733             | -0.0098         | 0.0114          | 0.0364          | 0.0684          |
| 2006 | 0.0186 | 0.0132 | 0.0660             | -0.0114         | 0.0040          | 0.0270          | 0.0588          |
| 2007 | 0.0221 | 0.0146 | 0.0613             | -0.0144         | 0.0000          | 0.0258          | 0.0601          |
| 2008 | 0.0328 | 0.0192 | 0.0712             | -0.0065         | 0.0088          | 0.0313          | 0.0696          |

## Panel C: Qualified Foreign Institutional Investors

| Year | Mean    | Median  | Standard Deviation | 20th Percentile | 40th Percentile | 60th Percentile | 80th Percentile |
|------|---------|---------|--------------------|-----------------|-----------------|-----------------|-----------------|
| 2003 | 0.0005  | 0.0063  | 0.0356             | -0.0258         | 0.0048          | 0.0157          | 0.0232          |
| 2004 | 0.0084  | 0.0124  | 0.0223             | 0.0037          | 0.0055          | 0.0140          | 0.0204          |
| 2005 | -0.0087 | -0.0037 | 0.0447             | -0.0134         | -0.0055         | 0.0000          | 0.0198          |
| 2006 | 0.0172  | 0.0063  | 0.0334             | -0.0010         | 0.0034          | 0.0098          | 0.0335          |
| 2007 | 0.0150  | 0.0099  | 0.0347             | -0.0131         | 0.0044          | 0.0176          | 0.0336          |
| 2008 | 0.0227  | 0.0131  | 0.0488             | -0.0003         | 0.0077          | 0.0233          | 0.0549          |

**Table AII. Individual Investors' Superstition and Mark-to-market Returns of Limit Orders at "8," "4," "0," and other Numbers – Quintile Analysis**

In this table, we sort individual investors into quintiles by the superstition index in one year, and report the subsequent year's mark-to-market return of limit orders submitted at prices ending with "8," "4," "0," and other numbers. Quintile-5 (Q5) investors are more superstitious. In each year, we calculate the superstition index for each investor as the difference between limit order submission ratios at "8" and "4." The submission ratio at "8" of an investor is calculated as the number of limit orders submitted at prices ending with "8" divided by the total number of limit orders submitted at all prices within a year. The submission ratio at "4" is calculated in a similar fashion. Mark-to-market intraday return is the difference between the trade price and the daily closing price divided by the trade price. Mark-to-market 1-day and 5-day returns are calculated in a similar fashion. All items are first calculated for each investor-year observation and then averaged for each quintile with equal weights. To ensure a reasonable magnitude of superstition index, we require that investors submit at least 10 limit orders in each of two consecutive years. The Satterthwaite p-value assumes unequal variances of investor performance in quintiles 1 and 5. \*, \*\*, and \*\*\* indicate significance levels of 0.1, 0.05, and 0.01, respectively.

| Quintile Ranks                                                                    | Q1     | Q2     | Q3     | Q4     | Q5     | Diff (Q5-Q1) | p-value |
|-----------------------------------------------------------------------------------|--------|--------|--------|--------|--------|--------------|---------|
| <i>Mark-to-market returns of limit orders submitted at prices ending with "8"</i> |        |        |        |        |        |              |         |
| Intraday (%)                                                                      | -0.056 | -0.056 | -0.055 | -0.068 | -0.073 | -0.017***    | 0.002   |
| 1-day (%)                                                                         | -0.076 | -0.102 | -0.084 | -0.109 | -0.110 | -0.034***    | 0.002   |
| 5-day (%)                                                                         | -0.063 | -0.153 | -0.117 | -0.134 | -0.166 | -0.103***    | 0.000   |
| <i>Mark-to-market returns of limit orders submitted at prices ending with "4"</i> |        |        |        |        |        |              |         |
| Intraday (%)                                                                      | -0.054 | -0.061 | -0.059 | -0.061 | -0.065 | -0.011*      | 0.099   |
| 1-day (%)                                                                         | -0.081 | -0.103 | -0.097 | -0.095 | -0.089 | -0.008       | 0.535   |
| 5-day (%)                                                                         | -0.148 | -0.176 | -0.172 | -0.175 | -0.154 | -0.006       | 0.821   |
| <i>Mark-to-market returns of limit orders submitted at prices ending with "0"</i> |        |        |        |        |        |              |         |
| Intraday (%)                                                                      | -0.074 | -0.089 | -0.089 | -0.084 | -0.094 | -0.020***    | 0.000   |
| 1-day (%)                                                                         | -0.111 | -0.128 | -0.126 | -0.119 | -0.131 | -0.021**     | 0.016   |
| 5-day (%)                                                                         | -0.185 | -0.241 | -0.208 | -0.183 | -0.221 | -0.036**     | 0.042   |
| <i>Mark-to-market returns of limit orders submitted at other prices</i>           |        |        |        |        |        |              |         |
| Intraday (%)                                                                      | -0.076 | -0.086 | -0.085 | -0.084 | -0.097 | -0.021***    | 0.000   |
| 1-day (%)                                                                         | -0.110 | -0.132 | -0.123 | -0.128 | -0.138 | -0.027***    | 0.000   |
| 5-day (%)                                                                         | -0.179 | -0.223 | -0.216 | -0.217 | -0.243 | -0.065***    | 0.000   |

**Table AIII. Individual Investors' Superstition and Mark-to-market Returns of Limit Orders at Prices Ending with "X" – Regression Analysis**

In this table, we report the parameter estimates from the following regression:

$$Return_{X,i,t} = \alpha + \beta_1 SI_{i,t-1} + (\beta_2 D_8 + \beta_3 D_4 + \beta_4 D_0) \times SI_{i,t-1} + \beta_5 D_8 + \beta_6 D_4 + \beta_7 D_0 \\ + \beta_8 OrderSize_{i,t-1} + \beta_9 SubRatio_{0\ and\ 5,i,t-1} + \beta_{10} Ln(N_{i,t-1}) + \beta_{11} Disposition_{i,t-1} \\ + \beta_{12} Return_{i,t-1} + \varepsilon_{X,i,t}$$

where  $Return_{X,i,t}$  is the performance of individual limit orders submitted at prices ending with "X" for investor  $i$  in year  $t$  (X is an integer ranging from 0 to 9).  $D_8$ ,  $D_4$ , and  $D_0$  are dummy variables for X=8, 4, and 0, respectively. Mark-to-market intraday return is the difference between the trade price and the daily closing price divided by the trade price. Mark-to-market 1-day and 5-day returns are calculated in a similar fashion.  $SI_{i,t-1}$  is the superstition index of investor  $i$  in year  $t-1$ , and it is calculated as the difference between limit order submission ratios at "8" and "4." The submission ratio at "8" of an investor is calculated as the number of limit orders submitted at prices ending with "8" divided by the total number of limit orders submitted at all prices within a year. The submission ratio at "4" is calculated in a similar fashion.  $OrderSize_{i,t-1}$  is the average number of contracts per limit order submitted by investor  $i$  in year  $t-1$ .  $SubRatio_{0\ and\ 5,i,t-1}$  is the sum of investor  $i$ 's submission ratios at prices ending with "0" and "5" in year  $t-1$ .  $Ln(N_{i,t-1})$  is the log of the number of limit orders submitted by investor  $i$  in year  $t-1$ .  $Disposition_{i,t-1}$  is the disposition effect, which is calculated as the difference between the durations of losing and winning round-trip trades of investor  $i$  in year  $t-1$ , divided by their average.  $Return_{i,t-1}$  is the average intraday, 1-day, or 5-day mark-to-market return for investor  $i$  in year  $t-1$ . To ensure a reasonable magnitude of the superstition index, we require that investors submit at least 10 limit orders in each of two consecutive years. \*, \*\*, and \*\*\* indicate significance levels of 0.1, 0.05, and 0.01, respectively.

| Independent Variable         | Mark-to-market Return of Limit Orders (%) |                      |                      |
|------------------------------|-------------------------------------------|----------------------|----------------------|
|                              | Intraday                                  | 1-day                | 5-day                |
| $SI_{i,t-1}$                 | -0.072***<br>(0.000)                      | -0.094*<br>(0.054)   | -0.220**<br>(0.014)  |
| $SI_{i,t-1} \times D_8$      | -0.016<br>(0.666)                         | 0.046<br>(0.555)     | 0.028<br>(0.858)     |
| $SI_{i,t-1} \times D_4$      | -0.050<br>(0.381)                         | -0.162<br>(0.177)    | 0.125<br>(0.596)     |
| $SI_{i,t-1} \times D_0$      | -0.003<br>(0.947)                         | -0.082<br>(0.311)    | -0.084<br>(0.599)    |
| $D_8$                        | 0.011***<br>(0.002)                       | 0.002<br>(0.772)     | 0.010<br>(0.491)     |
| $D_4$                        | 0.022***<br>(0.000)                       | 0.025***<br>(0.002)  | 0.032*<br>(0.055)    |
| $D_0$                        | 0.002<br>(0.406)                          | 0.016***<br>(0.004)  | 0.026**<br>(0.028)   |
| $OrderSize_{i,t-1}$          | 0.002***<br>(0.000)                       | 0.000<br>(0.624)     | -0.002<br>(0.230)    |
| $SubRatio_{0\ and\ 5,i,t-1}$ | -0.039***<br>(0.000)                      | -0.084***<br>(0.000) | -0.151***<br>(0.000) |
| $Ln(N_{i,t-1})$              | 0.010***<br>(0.000)                       | 0.013***<br>(0.000)  | 0.010***<br>(0.008)  |
| $Disposition_{i,t-1}$        | -0.027***                                 | -0.035***            | -0.027***            |

|                                       |           |           |           |
|---------------------------------------|-----------|-----------|-----------|
|                                       | (0.000)   | (0.000)   | (0.000)   |
| <i>Return</i> <sub><i>i,t-1</i></sub> | 0.015***  | 0.005     | 0.008**   |
|                                       | (0.000)   | (0.185)   | (0.026)   |
| Constant                              | -0.052*** | -0.083*** | -0.071*** |
|                                       | (0.000)   | (0.000)   | (0.005)   |
| Year fixed effect                     | Yes       | Yes       | Yes       |
| Number of obs.                        | 176,888   | 176,622   | 172,041   |
| Adjusted R <sup>2</sup>               | 0.008     | 0.003     | 0.005     |

---

**Table AIV. Number of “X”s Where Superstitious Individual Investors Underperform**

In this table, we sort individual investors into quintiles by the superstition index in one year, and examine the performance of limit orders submitted at prices ending with “X” in the subsequent year (X is an integer ranging from 0 to 9). We report the number of “X”s where Quintile-5 investors (significantly) underperform Quintile-1 investors. Quintile-5 (Q5) investors are more superstitious. In each year, we calculate the superstition index for each investor as the difference between limit order submission ratios at “8” and “4.” The submission ratio at “8” of an investor is calculated as the number of limit orders submitted at prices ending with “8” divided by the total number of limit orders submitted at all prices within a year. The submission ratio at “4” is calculated in a similar fashion. The underperformance is determined based on the intraday, 1-day, as well as 5-day mark-to-market returns of limit orders. Mark-to-market intraday return is the difference between the trade price and the daily closing price divided by the trade price. Mark-to-market 1-day and 5-day returns are calculated in a similar fashion. To ensure a reasonable magnitude of superstition index, we require that investors submit at least 10 limit orders in each of two consecutive years. The Satterthwaite p-value assumes unequal variances of investor performance in quintiles 1 and 5. \*, \*\*, and \*\*\* indicate significance levels of 0.1, 0.05, and 0.01, respectively.

| Significance Level | Number of "X"s where Q-5 individual investors underperform Q-1 investors |       |       |
|--------------------|--------------------------------------------------------------------------|-------|-------|
|                    | Intraday                                                                 | 1-day | 5-day |
| p<1                | 10                                                                       | 10    | 10    |
| p<0.1              | 10                                                                       | 10    | 10    |
| p<0.05             | 10                                                                       | 10    | 10    |
| p<0.01             | 10                                                                       | 10    | 10    |

**Table AV. Superstition Index and Investment Performance of All Investors – Regression Analysis**

In this table we report the parameter estimates for the following panel regression:

$$Return_{i,t} = \alpha + \beta_1 SI_{i,t-1} + \beta_2 OrderSize_{i,t-1} + \beta_3 SubRatio_{0\ and\ 5,i,t-1} + \beta_4 Ln(N_{i,t-1}) + \beta_5 Disposition_{i,t-1} + \beta_6 Return_{i,t-1} + \varepsilon_{i,t}$$

where  $Return_{i,t}$  and  $Return_{i,t-1}$  are the average mark-to-market returns or round-trip performance for investor  $i$  in year  $t$  and year  $t-1$ .  $SI_{i,t-1}$  is investor  $i$ 's superstition index in year  $t-1$ , calculated as the difference between limit order submission ratios at "8" and "4." In each year, we calculate the investor's submission ratio at "8" as the number of limit orders submitted at prices ending with "8" divided by the total number of limit orders submitted at all prices. The submission ratio at "4" is calculated in a similar fashion.  $OrderSize_{i,t-1}$  is the average number of contracts per limit order submitted by investor  $i$  in year  $t-1$ .  $SubRatio_{0\ and\ 5,i,t-1}$  is the sum of investor  $i$ 's submission ratios at prices ending with "0" and "5" in year  $t-1$ .  $Ln(N_{i,t-1})$  is the log of number of limit orders submitted by investor  $i$  in the previous year.  $Disposition_{i,t-1}$  is the difference between the durations of losing and winning round-trip trades of investor  $i$  in year  $t-1$ , divided by their average. Mark-to-market return of limit (market) orders is the return under the assumption that the initiating limit (market) orders are covered at the closing price of a trading day. The round-trip daily profit and daily index return are calculated as the average round-trip profit or index return divided by the average round-trip duration for each investor. Results for individual (Panel A) and institutional investors (Panels B and C) are reported separately. Standard errors are adjusted for heteroskedasticity. To ensure a reasonable magnitude of the superstition index, we require that investors submit at least 10 limit orders in each of two consecutive years. \*, \*\*, and \*\*\* indicate significance levels of 0.1, 0.05, and 0.01, respectively.

Panel A: Individual Investors

| Independent Variable                  | Mark-to-market Return of Limit Orders (%) |                      |                      | Mark-to-market Return of Market Orders (%) |                      |                      | Round-trip Performance |                        |
|---------------------------------------|-------------------------------------------|----------------------|----------------------|--------------------------------------------|----------------------|----------------------|------------------------|------------------------|
|                                       | Intraday                                  | 1-day                | 5-day                | Intraday                                   | 1-day                | 5-day                | Daily profit (TWD)     | Daily index return (%) |
| $SI_{i,t-1}$                          | -0.029***<br>(0.003)                      | -0.035*<br>(0.094)   | -0.090**<br>(0.045)  | -0.014<br>(0.627)                          | -0.092<br>(0.120)    | -0.198*<br>(0.090)   | -8,589.073*<br>(0.065) | -0.696*<br>(0.064)     |
| $OrderSize_{i,t-1}$                   | 0.001***<br>(0.001)                       | -0.000<br>(0.745)    | -0.001<br>(0.425)    | 0.000<br>(0.672)                           | -0.000<br>(0.861)    | -0.005<br>(0.169)    | -345.576<br>(0.556)    | -0.022<br>(0.632)      |
| $SubRatio_{0 \text{ and } 5, i, t-1}$ | -0.023***<br>(0.000)                      | -0.050***<br>(0.000) | -0.096***<br>(0.000) | -0.017*<br>(0.052)                         | -0.050***<br>(0.009) | -0.076*<br>(0.053)   | 14,317.476<br>(0.341)  | 1.171<br>(0.337)       |
| $Ln(N_{i,t-1})$                       | 0.005***<br>(0.000)                       | 0.006***<br>(0.000)  | 0.004<br>(0.189)     | 0.008***<br>(0.000)                        | 0.009**<br>(0.012)   | 0.006<br>(0.427)     | 2,450.266<br>(0.209)   | 0.200<br>(0.205)       |
| $Disposition_{i,t-1}$                 | -0.009***<br>(0.000)                      | -0.016***<br>(0.000) | -0.011**<br>(0.017)  | -0.012***<br>(0.000)                       | -0.015**<br>(0.019)  | -0.003<br>(0.798)    | 4,354.670<br>(0.375)   | 0.352<br>(0.377)       |
| $Return_{i,t-1}$                      | 0.022***<br>(0.000)                       | 0.010***<br>(0.002)  | 0.007**<br>(0.021)   | 0.003<br>(0.525)                           | -0.001<br>(0.825)    | 0.001<br>(0.878)     | 0.057**<br>(0.033)     | 0.056**<br>(0.050)     |
| Constant                              | -0.101***<br>(0.000)                      | -0.132***<br>(0.000) | -0.269***<br>(0.000) | -0.048***<br>(0.000)                       | -0.077***<br>(0.001) | -0.144***<br>(0.003) | -22,735.463<br>(0.190) | -1.848<br>(0.188)      |
| Year fixed effect                     | Yes                                       | Yes                  | Yes                  | Yes                                        | Yes                  | Yes                  | Yes                    | Yes                    |
| Number of obs.                        | 140,724                                   | 140,700              | 140,180              | 53,412                                     | 53,260               | 51,247               | 140,608                | 140,608                |
| Adjusted R <sup>2</sup>               | 0.012                                     | 0.004                | 0.008                | 0.003                                      | 0.002                | 0.002                | -0.000                 | -0.000                 |

Panel B: Domestic Institutions

| Independent Variable                  | Mark-to-market Return of Limit Orders (%) |                      |                      | Mark-to-market Return of Market Orders (%) |                   |                   | Round-trip Performance    |                        |
|---------------------------------------|-------------------------------------------|----------------------|----------------------|--------------------------------------------|-------------------|-------------------|---------------------------|------------------------|
|                                       | Intraday                                  | 1-day                | 5-day                | Intraday                                   | 1-day             | 5-day             | Daily profit (TWD)        | Daily index return (%) |
| $SI_{i,t-1}$                          | -0.210<br>(0.250)                         | -0.630<br>(0.164)    | -1.731<br>(0.136)    | 1.067*<br>(0.090)                          | 1.603<br>(0.108)  | 0.909<br>(0.697)  | -30,441.496<br>(0.852)    | -2.953<br>(0.804)      |
| $OrderSize_{i,t-1}$                   | 0.001<br>(0.626)                          | 0.005<br>(0.149)     | 0.009<br>(0.292)     | 0.003<br>(0.516)                           | 0.008<br>(0.473)  | 0.006<br>(0.882)  | -2,702.743<br>(0.625)     | -0.152<br>(0.684)      |
| $SubRatio_{0 \text{ and } 5, i, t-1}$ | -0.094<br>(0.154)                         | -0.298*<br>(0.070)   | -0.067<br>(0.822)    | -0.239<br>(0.234)                          | -0.239<br>(0.577) | 0.781<br>(0.329)  | -109,654.930**<br>(0.038) | -4.246<br>(0.271)      |
| $Ln(N_{i,t-1})$                       | -0.002<br>(0.720)                         | -0.015<br>(0.337)    | -0.002<br>(0.951)    | -0.003<br>(0.860)                          | -0.029<br>(0.381) | 0.021<br>(0.765)  | -43,337.750***<br>(0.006) | -1.131<br>(0.332)      |
| $Disposition_{i,t-1}$                 | -0.050***<br>(0.002)                      | -0.143***<br>(0.000) | -0.255***<br>(0.001) | 0.051<br>(0.322)                           | 0.155<br>(0.111)  | 0.020<br>(0.919)  | -80,629.523***<br>(0.001) | -5.759***<br>(0.002)   |
| $Return_{i,t-1}$                      | 0.100<br>(0.140)                          | -0.033<br>(0.645)    | 0.034<br>(0.480)     | -0.107<br>(0.340)                          | -0.247<br>(0.129) | -0.205<br>(0.110) | 0.043<br>(0.817)          | 0.008<br>(0.965)       |
| Constant                              | 0.045<br>(0.449)                          | 0.214<br>(0.109)     | 0.181<br>(0.492)     | 0.091<br>(0.424)                           | 0.256<br>(0.393)  | -0.351<br>(0.588) | 297,375.906***<br>(0.002) | 8.687<br>(0.218)       |
| Year fixed effect                     | Yes                                       | Yes                  | Yes                  | Yes                                        | Yes               | Yes               | Yes                       | Yes                    |
| Number of obs.                        | 563                                       | 563                  | 561                  | 259                                        | 256               | 244               | 554                       | 554                    |
| Adjusted R <sup>2</sup>               | 0.024                                     | 0.034                | 0.036                | -0.005                                     | 0.033             | -0.015            | 0.063                     | 0.035                  |

Panel C: Qualified Foreign Institutional Investors

| Independent Variable                  | Mark-to-market Return of Limit Orders (%) |                     |                     | Mark-to-market Return of Market Orders (%) |                   |                   | Round-trip Performance  |                        |
|---------------------------------------|-------------------------------------------|---------------------|---------------------|--------------------------------------------|-------------------|-------------------|-------------------------|------------------------|
|                                       | Intraday                                  | 1-day               | 5-day               | Intraday                                   | 1-day             | 5-day             | Daily profit (TWD)      | Daily index return (%) |
| $SI_{i,t-1}$                          | -0.491<br>(0.441)                         | -0.558<br>(0.750)   | 0.947<br>(0.763)    | 3.355*<br>(0.083)                          | -2.177<br>(0.619) | 8.292<br>(0.162)  | -3740699.500<br>(0.190) | -193.907<br>(0.314)    |
| $OrderSize_{i,t-1}$                   | -0.003<br>(0.416)                         | 0.009<br>(0.348)    | 0.008<br>(0.689)    | -0.012<br>(0.279)                          | 0.037<br>(0.203)  | 0.105<br>(0.195)  | 26,424.318<br>(0.432)   | 1.699<br>(0.484)       |
| $SubRatio_{0 \text{ and } 5, i, t-1}$ | -0.021<br>(0.860)                         | -0.686**<br>(0.034) | -1.127**<br>(0.022) | 0.211<br>(0.594)                           | -0.237<br>(0.760) | 1.224<br>(0.370)  | -100,800.758<br>(0.842) | -2.970<br>(0.926)      |
| $Ln(N_{i,t-1})$                       | 0.007<br>(0.447)                          | -0.008<br>(0.799)   | 0.081*<br>(0.092)   | 0.017<br>(0.648)                           | 0.000<br>(0.999)  | -0.077<br>(0.698) | 81,184.500<br>(0.107)   | 7.761**<br>(0.030)     |
| $Disposition_{i,t-1}$                 | -0.031<br>(0.270)                         | -0.008<br>(0.859)   | 0.091<br>(0.533)    | -0.004<br>(0.946)                          | 0.044<br>(0.789)  | 0.173<br>(0.680)  | -43,563.090<br>(0.838)  | -1.666<br>(0.914)      |
| $Return_{i,t-1}$                      | 0.138<br>(0.195)                          | 0.024<br>(0.829)    | 0.044<br>(0.734)    | 0.060<br>(0.713)                           | 0.282<br>(0.132)  | -0.159<br>(0.453) | -0.017<br>(0.864)       | -0.047<br>(0.597)      |
| Constant                              | 0.005<br>(0.967)                          | 0.627<br>(0.140)    | 0.448<br>(0.433)    | -0.053<br>(0.894)                          | -0.196<br>(0.837) | -1.158<br>(0.645) | 1348741.250<br>(0.302)  | 104.336<br>(0.299)     |
| Year fixed effect                     | Yes                                       | Yes                 | Yes                 | Yes                                        | Yes               | Yes               | Yes                     | Yes                    |
| Number of obs.                        | 166                                       | 165                 | 165                 | 65                                         | 64                | 60                | 153                     | 153                    |
| Adjusted R <sup>2</sup>               | -0.012                                    | 0.016               | 0.043               | -0.084                                     | -0.052            | -0.100            | 0.060                   | 0.093                  |

**Table AVI. Superstition, Cognitive Limitation, and Intraday Mark-to-market Returns of Limit Orders of Individual Investors**

In this table we double sort individual investors into quintiles by the superstition index and the submission ratio at “0” in year  $t-1$ , and report the intraday mark-to-market return of limit orders in year  $t$ . Quintile-5 (Q5) investors are more superstitious or have higher submission ratios at round number prices. In each year, we calculate the superstition index for each investor as the difference between limit order submission ratios at “8” and “4.” The submission ratio at “8” of an investor is calculated as the number of limit orders submitted at prices ending with “8” divided by the total number of limit orders submitted at all prices within a year. The submission ratio at “4” and “0” are calculated in a similar fashion. Mark-to-market intraday return is expressed in percentage, and is the difference between the trade price and the daily closing price divided by the trade price. All items are first calculated for each investor-year observation and then averaged for each quintile with equal weights. To ensure a reasonable magnitude of superstition index, we require that investors submit at least 10 limit orders in each of two consecutive years. The Satterthwaite p-value assumes unequal variances of investor performance in quintiles 1 and 5. \*, \*\*, and \*\*\* indicate significance levels of 0.1, 0.05, and 0.01, respectively.

| Quintile Ranks of<br>$SubRatio_{0,t-1}$ | Quintile Ranks of $SI_{t-1}$ |           |           |           |         | Diff (Q5-Q1) | p-value |
|-----------------------------------------|------------------------------|-----------|-----------|-----------|---------|--------------|---------|
|                                         | Q1                           | Q2        | Q3        | Q4        | Q5      |              |         |
| Q1                                      | -0.057                       | -0.058    | -0.059    | -0.074    | -0.088  | -0.032***    | 0.000   |
| Q2                                      | -0.077                       | -0.069    | -0.070    | -0.075    | -0.092  | -0.014***    | 0.003   |
| Q3                                      | -0.082                       | -0.074    | -0.090    | -0.079    | -0.098  | -0.015***    | 0.004   |
| Q4                                      | -0.092                       | -0.100    | -0.095    | -0.096    | -0.103  | -0.012*      | 0.051   |
| Q5                                      | -0.102                       | -0.109    | -0.110    | -0.106    | -0.102  | -0.000       | 0.990   |
| Diff (Q5-Q1)                            | -0.045***                    | -0.050*** | -0.051*** | -0.032*** | -0.014* |              |         |
| p-value                                 | 0.000                        | 0.000     | 0.000     | 0.000     | 0.051   |              |         |

**Table AVII. Individual Investors' Superstition Index and Investment Performance – Two-Stage Regression**

In this table, we report the parameter estimates of a two-stage panel regression for individual investors. In the first stage, we perform the following regression for each of the eight return measures separately:

$$SI_{i,t-1} = \alpha + \beta_1 OrderSize_{i,t-1} + \beta_2 SubRatio_{0\ and\ 5,i,t-1} + \beta_3 Ln(N_{i,t-1}) + \beta_4 Disposition_{i,t-1} + \beta_5 Return_{i,t-1} + \varepsilon_{i,t-1}$$

We take  $Residual\_SI_{i,t-1}$ , the residual superstition index, from the first stage regression and perform the following regression in the second stage:

$$Return_{i,t} = \alpha + \beta_1 Residual\_SI_{i,t-1} + \beta_2 OrderSize_{i,t-1} + \beta_3 SubRatio_{0\ and\ 5,i,t-1} + \beta_4 Ln(N_{i,t-1}) + \beta_5 Disposition_{i,t-1} + \beta_6 Return_{i,t-1} + \varepsilon_{i,t}$$

where  $Return_{i,t}$  and  $Return_{i,t-1}$  are the average mark-to-market returns or round-trip performance for investor  $i$  in year  $t$  and year  $t-1$ .  $SI_{i,t-1}$  is investor  $i$ 's superstition index in year  $t-1$ , which is calculated as the difference between limit order submission ratios at “8” and “4.” The submission ratio at “8” of an investor is calculated as the number of limit orders submitted at prices ending with “8” divided by the total number of limit orders submitted at all prices within a year. The submission ratio at “4” is calculated in a similar fashion.  $OrderSize_{i,t-1}$  is the average number of contracts per limit order submitted by investor  $i$  in year  $t-1$ .  $SubRatio_{0\ and\ 5,i,t-1}$  is the sum of investor  $i$ 's submission ratios at prices ending with “0” and “5” in year  $t-1$ .  $Ln(N_{i,t-1})$  is the log of number of limit orders submitted by investor  $i$  in the previous year.  $Disposition_{i,t-1}$  is the difference between the durations of losing and winning round-trip trades of investor  $i$  in year  $t-1$ , divided by their average. Mark-to-market return of limit (market) orders is the return under the assumption that the initiating limit (market) orders are covered at the closing price of a trading day. The round-trip daily profit and daily index return are calculated as the average round-trip profit or index return divided by the average round-trip duration for each investor. Results for the first and second stage regressions are separately reported in Panel A and Panel B. Standard errors are adjusted for heteroskedasticity. To ensure a reasonable magnitude of the superstition index, we require that investors submit at least 10 limit orders in each of two consecutive years. \*, \*\*, and \*\*\* indicate significance levels of 0.1, 0.05, and 0.01, respectively.

Panel A (First Stage Regression): Regressing Superstition Index on Other Aspects of Investor Trading Skills

| Independent Variable                | Mark-to-market Return of Limit Orders (%) |                      |                      | Mark-to-market Return of Market Orders (%) |                      |                      | Round-trip Performance |                        |
|-------------------------------------|-------------------------------------------|----------------------|----------------------|--------------------------------------------|----------------------|----------------------|------------------------|------------------------|
|                                     | Intraday                                  | 1-day                | 5-day                | Intraday                                   | 1-day                | 5-day                | Daily profit (TWD)     | Daily index return (%) |
| $OrderSize_{i,t-1}$                 | -0.001***<br>(0.000)                      | -0.001***<br>(0.000) | -0.001***<br>(0.000) | -0.001***<br>(0.000)                       | -0.001***<br>(0.000) | -0.001***<br>(0.000) | -0.001***<br>(0.000)   | -0.001***<br>(0.000)   |
| $SubRatio_{0 \text{ and } 5,i,t-1}$ | -0.040***<br>(0.000)                      | -0.040***<br>(0.000) | -0.039***<br>(0.000) | -0.034***<br>(0.000)                       | -0.034***<br>(0.000) | -0.034***<br>(0.000) | -0.039***<br>(0.000)   | -0.039***<br>(0.000)   |
| $Ln(N_{i,t-1})$                     | -0.002***<br>(0.000)                      | -0.002***<br>(0.000) | -0.002***<br>(0.000) | -0.002***<br>(0.000)                       | -0.002***<br>(0.000) | -0.002***<br>(0.000) | -0.002***<br>(0.000)   | -0.002***<br>(0.000)   |
| $Disposition_{i,t-1}$               | 0.005***<br>(0.000)                       | 0.005***<br>(0.000)  | 0.006***<br>(0.000)  | 0.006***<br>(0.000)                        | 0.006***<br>(0.000)  | 0.006***<br>(0.000)  | 0.005***<br>(0.000)    | 0.005***<br>(0.000)    |
| $Return_{i,t-1}$                    | -0.010***<br>(0.000)                      | -0.002***<br>(0.008) | 0.001<br>(0.158)     | -0.000<br>(0.748)                          | -0.000<br>(0.709)    | 0.000<br>(0.144)     | -0.000**<br>(0.031)    | -0.000**<br>(0.026)    |
| Constant                            | 0.069***<br>(0.000)                       | 0.070***<br>(0.000)  | 0.071***<br>(0.000)  | 0.065***<br>(0.000)                        | 0.065***<br>(0.000)  | 0.065***<br>(0.000)  | 0.070***<br>(0.000)    | 0.070***<br>(0.000)    |
| Year fixed effect                   | Yes                                       | Yes                  | Yes                  | Yes                                        | Yes                  | Yes                  | Yes                    | Yes                    |
| Number of obs.                      | 57,217                                    | 57,215               | 57,189               | 33,585                                     | 33,545               | 32,942               | 57,263                 | 57,263                 |
| Adjusted R <sup>2</sup>             | 0.017                                     | 0.017                | 0.017                | 0.015                                      | 0.015                | 0.015                | 0.016                  | 0.016                  |

Panel B (Second Stage Regression): Regressing Investment Performance on Residual Superstition Index

| Independent Variable              | Mark-to-market Return of Limit Orders (%) |                      |                      | Mark-to-market Return of Market Orders (%) |                      |                      | Round-trip Performance |                        |
|-----------------------------------|-------------------------------------------|----------------------|----------------------|--------------------------------------------|----------------------|----------------------|------------------------|------------------------|
|                                   | Intraday                                  | 1-day                | 5-day                | Intraday                                   | 1-day                | 5-day                | Daily profit (TWD)     | Daily index return (%) |
| $Residual\_SI_{i,t-1}$            | -0.068***<br>(0.000)                      | -0.103***<br>(0.001) | -0.269***<br>(0.000) | -0.046<br>(0.232)                          | -0.176**<br>(0.026)  | -0.206<br>(0.195)    | -15,849.138<br>(0.145) | -1.270<br>(0.147)      |
| $OrderSize_{i,t-1}$               | 0.002***<br>(0.007)                       | 0.001<br>(0.565)     | -0.001<br>(0.518)    | 0.002<br>(0.124)                           | 0.002<br>(0.331)     | -0.001<br>(0.774)    | -1,650.379<br>(0.187)  | -0.114<br>(0.241)      |
| $SubRatio_{0\text{ and }5,i,t-1}$ | -0.038***<br>(0.000)                      | -0.077***<br>(0.000) | -0.162***<br>(0.000) | -0.047***<br>(0.000)                       | -0.107***<br>(0.000) | -0.133***<br>(0.010) | 37,803.789<br>(0.328)  | 3.085<br>(0.325)       |
| $Ln(N_{i,t-1})$                   | 0.010***<br>(0.000)                       | 0.013***<br>(0.000)  | 0.007*<br>(0.080)    | 0.012***<br>(0.000)                        | 0.017***<br>(0.000)  | 0.011<br>(0.270)     | 3,592.455<br>(0.295)   | 0.293<br>(0.288)       |
| $Disposition_{i,t-1}$             | -0.024***<br>(0.000)                      | -0.034***<br>(0.000) | -0.023***<br>(0.001) | -0.023***<br>(0.000)                       | -0.040***<br>(0.000) | -0.040**<br>(0.026)  | 16,403.018<br>(0.268)  | 1.335<br>(0.267)       |
| $Return_{i,t-1}$                  | 0.071***<br>(0.000)                       | 0.032***<br>(0.000)  | 0.025***<br>(0.000)  | 0.011<br>(0.254)                           | 0.002<br>(0.864)     | 0.013<br>(0.205)     | 0.632***<br>(0.000)    | 0.640***<br>(0.001)    |
| Constant                          | -0.049***<br>(0.000)                      | -0.084***<br>(0.000) | -0.046*<br>(0.078)   | -0.048***<br>(0.001)                       | -0.058*<br>(0.059)   | -0.066<br>(0.287)    | -3,393.385<br>(0.461)  | -0.327<br>(0.358)      |
| Year fixed effect                 | Yes                                       | Yes                  | Yes                  | Yes                                        | Yes                  | Yes                  | Yes                    | Yes                    |
| Number of obs.                    | 56,968                                    | 56,963               | 56,824               | 25,723                                     | 25,673               | 24,962               | 56,830                 | 56,830                 |
| Adjusted R <sup>2</sup>           | 0.029                                     | 0.010                | 0.014                | 0.006                                      | 0.005                | 0.003                | 0.000                  | 0.000                  |

### Table AVIII. A Placebo Test: Pseudo Superstition Index and Investment Performance of Individual Investors– Regression Analysis

In this table we report the parameter estimates for the following panel regression:

$$Return_{i,t} = \alpha + \beta_1 SI_{i,t-1} + \beta_2 OrderSize_{i,t-1} + \beta_3 SubRatio_{0\ and\ 5,i,t-1} + \beta_4 Ln(N_{i,t-1}) + \beta_5 Disposition_{i,t-1} + \beta_6 Return_{i,t-1} + \varepsilon_{i,t}$$

where  $Return_{i,t}$  and  $Return_{i,t-1}$  are the average mark-to-market returns or round-trip performance for investor  $i$  in year  $t$  and year  $t-1$ .  $SI_{i,t-1}$  is investor  $i$ 's pseudo superstition index in year  $t-1$ , calculated as the difference between limit order submission ratios at “7” and “3.” In each year, we calculate the investor’s submission ratio at “7” as the number of limit orders submitted at prices ending with “7” divided by the total number of limit orders submitted at all prices within a year. The submission ratio at “3” is calculated in a similar fashion.  $OrderSize_{i,t-1}$  is the average number of contracts per limit order submitted by investor  $i$  in year  $t-1$ .  $SubRatio_{0\ and\ 5,i,t-1}$  is the sum of investor  $i$ 's submission ratios at prices ending with “0” and “5” in year  $t-1$ .  $Ln(N_{i,t-1})$  is the log of number of limit orders submitted by investor  $i$  in the previous year.  $Disposition_{i,t-1}$  is the difference between the durations of losing and winning round-trip trades of investor  $i$  in year  $t-1$ , divided by their average. Mark-to-market return of limit (market) orders is the return under the assumption that the initiating limit (market) orders are covered at the closing price of a trading day. The round-trip daily profit and daily index return are calculated as the average round-trip profit or index return divided by the average round-trip duration for each investor. Standard errors are adjusted for heteroskedasticity. To ensure a reasonable magnitude of the superstition index, we require that investors submit at least 10 limit orders in each of two consecutive years. \*, \*\*, and \*\*\* indicate significance levels of 0.1, 0.05, and 0.01, respectively.

| Independent<br>Variable               | Mark-to-market Return of Limit<br>Orders (%) |                      |                      | Mark-to-market Return of Market<br>Orders (%) |                      |                      | Round-trip Performance   |                           |
|---------------------------------------|----------------------------------------------|----------------------|----------------------|-----------------------------------------------|----------------------|----------------------|--------------------------|---------------------------|
|                                       | Intraday                                     | 1-day                | 5-day                | Intraday                                      | 1-day                | 5-day                | Daily profit<br>(TWD)    | Daily index return<br>(%) |
| $SI_{i,t-1}$                          | -0.015<br>(0.580)                            | 0.034<br>(0.542)     | 0.176<br>(0.130)     | -0.060<br>(0.397)                             | 0.113<br>(0.413)     | 0.067<br>(0.819)     | 4,739.201<br>(0.258)     | 0.237<br>(0.478)          |
| $OrderSize_{i,t-1}$                   | 0.002***<br>(0.000)                          | -0.001<br>(0.521)    | -0.004**<br>(0.039)  | 0.002<br>(0.174)                              | 0.003<br>(0.149)     | -0.003<br>(0.591)    | -1,029.776<br>(0.123)    | -0.055<br>(0.231)         |
| $SubRatio_{0 \text{ and } 5, i, t-1}$ | -0.039***<br>(0.000)                         | -0.083***<br>(0.000) | -0.163***<br>(0.000) | -0.044***<br>(0.001)                          | -0.118***<br>(0.000) | -0.204***<br>(0.001) | -752.143<br>(0.433)      | -0.066<br>(0.358)         |
| $Ln(N_{i,t-1})$                       | 0.011***<br>(0.000)                          | 0.017***<br>(0.000)  | 0.017***<br>(0.000)  | 0.011***<br>(0.000)                           | 0.022***<br>(0.000)  | 0.025**<br>(0.021)   | 966.223**<br>(0.016)     | 0.078***<br>(0.008)       |
| $Disposition_{i,t-1}$                 | -0.019***<br>(0.000)                         | -0.048***<br>(0.000) | -0.139***<br>(0.000) | -0.019***<br>(0.000)                          | -0.058***<br>(0.000) | -0.145***<br>(0.000) | -4,654.303***<br>(0.000) | -0.384***<br>(0.000)      |
| $Return_{i,t-1}$                      | 0.091***<br>(0.000)                          | 0.027***<br>(0.002)  | 0.026***<br>(0.001)  | 0.019*<br>(0.092)                             | 0.007<br>(0.527)     | 0.008<br>(0.483)     | 0.550***<br>(0.002)      | 0.540***<br>(0.004)       |
| Constant                              | -0.061***<br>(0.000)                         | -0.097***<br>(0.000) | -0.045<br>(0.105)    | -0.047***<br>(0.004)                          | -0.073**<br>(0.036)  | -0.074<br>(0.286)    | -638.298<br>(0.774)      | -0.103<br>(0.485)         |
| Year fixed effect                     | Yes                                          | Yes                  | Yes                  | Yes                                           | Yes                  | Yes                  | Yes                      | Yes                       |
| Number of obs.                        | 46,741                                       | 46,737               | 46,648               | 21,323                                        | 21,280               | 20,685               | 46,815                   | 46,815                    |
| Adjusted R <sup>2</sup>               | 0.032                                        | 0.014                | 0.024                | 0.005                                         | 0.006                | 0.006                | 0.084                    | 0.089                     |

**Table AIX. Individual Investors' Superstition Index and Investment Performance – Lucky vs. Unlucky Side**

In this table we report the parameter estimates for the following panel regression:

$$Return_{i,t} = \alpha + \beta_1 SI_{i,t-1} + \beta_2 OrderSize_{i,t-1} + \beta_3 SubRatio_{0\text{ and }5,i,t-1} + \beta_4 Ln(N_{i,t-1}) + \beta_5 Disposition_{i,t-1} + \beta_6 Return_{i,t-1} + \varepsilon_{i,t}$$

where  $Return_{i,t}$  and  $Return_{i,t-1}$  are the average mark-to-market returns or round-trip performance for investor  $i$  in year  $t$  and year  $t-1$ .  $SI_{i,t-1}$  is the lucky or unlucky part of investor  $i$ 's superstition index in year  $t-1$ . In Panel A, we consider the lucky part of superstition index by calculating  $SI_{i,t-1}$  as the difference between limit order submission ratios at “8” and “3” for investor  $i$  in year  $t-1$ . In Panel B, we consider the unlucky part of superstition index by calculating  $SI_{i,t-1}$  as the difference between limit order submission ratios at “3” and “4” for investor  $i$  in year  $t-1$ . The submission ratio at “8” of an investor is calculated as the number of limit orders submitted at prices ending with “8” divided by the total number of limit orders submitted at all prices within a year. The submission ratios at “3” and “4” are calculated in a similar fashion.  $OrderSize_{i,t-1}$  is the average number of contracts per limit order submitted by investor  $i$  in year  $t-1$ .  $SubRatio_{0\text{ and }5,i,t-1}$  is the sum of investor  $i$ 's submission ratios at prices ending with “0” and “5” in year  $t-1$ .  $Ln(N_{i,t-1})$  is the log of number of limit orders submitted by investor  $i$  in the previous year.  $Disposition_{i,t-1}$  is the difference between the durations of losing and winning round-trip trades of investor  $i$  in year  $t-1$ , divided by their average. Mark-to-market return of limit (market) orders is the return under the assumption that the initiating limit (market) orders are covered at the closing price of a trading day. The round-trip daily profit and daily index return are calculated as the average round-trip profit or index return divided by the average round-trip duration for each investor. Standard errors are adjusted for heteroskedasticity. To ensure a reasonable magnitude of the superstition index, we require that investors submit at least 10 limit orders in each of two consecutive years. \*, \*\*, and \*\*\* indicate significance levels of 0.1, 0.05, and 0.01, respectively.

Panel A: Lucky Part of the Superstition Index

| Independent Variable                      | Mark-to-market Return of Limit Orders (%) |                      |                      | Mark-to-market Return of Market Orders (%) |                      |                      | Round-trip Performance |                        |
|-------------------------------------------|-------------------------------------------|----------------------|----------------------|--------------------------------------------|----------------------|----------------------|------------------------|------------------------|
|                                           | Intraday                                  | 1-day                | 5-day                | Intraday                                   | 1-day                | 5-day                | Daily profit (TWD)     | Daily index return (%) |
| $SubRatio_{8,i,t-1} - SubRatio_{3,i,t-1}$ | -0.063***<br>(0.000)                      | -0.061*<br>(0.075)   | -0.180**<br>(0.011)  | -0.040<br>(0.356)                          | -0.092<br>(0.293)    | -0.272<br>(0.139)    | -39,311.340<br>(0.306) | -3.264<br>(0.293)      |
| $OrderSize_{i,t-1}$                       | 0.002***<br>(0.000)                       | 0.001<br>(0.539)     | -0.001<br>(0.557)    | 0.001<br>(0.249)                           | 0.002<br>(0.445)     | -0.003<br>(0.555)    | -1,643.621<br>(0.205)  | -0.114<br>(0.258)      |
| $SubRatio_{0 \text{ and } 5,i,t-1}$       | -0.046***<br>(0.000)                      | -0.083***<br>(0.000) | -0.172***<br>(0.000) | -0.049***<br>(0.000)                       | -0.127***<br>(0.000) | -0.178***<br>(0.002) | 48,620.242<br>(0.326)  | 3.956<br>(0.324)       |
| $Ln(N_{i,t-1})$                           | 0.011***<br>(0.000)                       | 0.015***<br>(0.000)  | 0.011**<br>(0.013)   | 0.013***<br>(0.000)                        | 0.019***<br>(0.000)  | 0.017<br>(0.108)     | 2,999.263<br>(0.286)   | 0.246<br>(0.276)       |
| $Disposition_{i,t-1}$                     | -0.023***<br>(0.000)                      | -0.033***<br>(0.000) | -0.028***<br>(0.000) | -0.024***<br>(0.000)                       | -0.042***<br>(0.000) | -0.038**<br>(0.048)  | 18,960.959<br>(0.268)  | 1.539<br>(0.268)       |
| $Return_{i,t-1}$                          | 0.082***<br>(0.000)                       | 0.031***<br>(0.000)  | 0.028***<br>(0.000)  | 0.015<br>(0.146)                           | 0.002<br>(0.883)     | 0.011<br>(0.308)     | 0.660***<br>(0.000)    | 0.667***<br>(0.001)    |
| Constant                                  | -0.052***<br>(0.000)                      | -0.091***<br>(0.000) | -0.054*<br>(0.053)   | -0.047***<br>(0.002)                       | -0.053<br>(0.105)    | -0.070<br>(0.294)    | -1,638.501<br>(0.580)  | -0.186<br>(0.385)      |
| Year fixed effect                         | Yes                                       | Yes                  | Yes                  | Yes                                        | Yes                  | Yes                  | Yes                    | Yes                    |
| Number of obs.                            | 51,836                                    | 51,832               | 51,709               | 23,349                                     | 23,303               | 22,646               | 51,756                 | 51,756                 |
| Adjusted R <sup>2</sup>                   | 0.030                                     | 0.010                | 0.014                | 0.006                                      | 0.004                | 0.003                | 0.000                  | 0.000                  |

Panel B: Unlucky Part of the Superstition Index

| Independent Variable                      | Mark-to-market Return of Limit Orders (%) |                      |                      | Mark-to-market Return of Market Orders (%) |                      |                      | Round-trip Performance   |                        |
|-------------------------------------------|-------------------------------------------|----------------------|----------------------|--------------------------------------------|----------------------|----------------------|--------------------------|------------------------|
|                                           | Intraday                                  | 1-day                | 5-day                | Intraday                                   | 1-day                | 5-day                | Daily profit (TWD)       | Daily index return (%) |
| $SubRatio_{3,i,t-1} - SubRatio_{4,i,t-1}$ | -0.013<br>(0.562)                         | -0.084*<br>(0.075)   | -0.248**<br>(0.014)  | -0.024<br>(0.684)                          | -0.033<br>(0.802)    | -0.034<br>(0.900)    | -5,608.824<br>(0.136)    | -0.374<br>(0.151)      |
| $OrderSize_{i,t-1}$                       | 0.002***<br>(0.000)                       | -0.000<br>(0.792)    | -0.003<br>(0.107)    | 0.002<br>(0.128)                           | 0.003<br>(0.166)     | -0.002<br>(0.709)    | -883.853<br>(0.183)      | -0.046<br>(0.314)      |
| $SubRatio_{0 \text{ and } 5,i,t-1}$       | -0.040***<br>(0.000)                      | -0.078***<br>(0.000) | -0.160***<br>(0.000) | -0.047***<br>(0.000)                       | -0.119***<br>(0.000) | -0.150***<br>(0.008) | -528.127<br>(0.559)      | -0.054<br>(0.410)      |
| $Ln(N_{i,t-1})$                           | 0.011***<br>(0.000)                       | 0.015***<br>(0.000)  | 0.017***<br>(0.000)  | 0.011***<br>(0.000)                        | 0.019***<br>(0.000)  | 0.018*<br>(0.078)    | 831.421**<br>(0.023)     | 0.068**<br>(0.011)     |
| $Disposition_{i,t-1}$                     | -0.020***<br>(0.000)                      | -0.047***<br>(0.000) | -0.136***<br>(0.000) | -0.018***<br>(0.000)                       | -0.054***<br>(0.000) | -0.147***<br>(0.000) | -4,539.066***<br>(0.000) | -0.375***<br>(0.000)   |
| $Return_{i,t-1}$                          | 0.081***<br>(0.000)                       | 0.025***<br>(0.001)  | 0.020***<br>(0.004)  | 0.017*<br>(0.083)                          | 0.005<br>(0.673)     | 0.010<br>(0.364)     | 0.531***<br>(0.001)      | 0.522***<br>(0.004)    |
| Constant                                  | -0.056***<br>(0.000)                      | -0.088***<br>(0.000) | -0.048*<br>(0.073)   | -0.043***<br>(0.005)                       | -0.057*<br>(0.087)   | -0.065<br>(0.330)    | -212.111<br>(0.918)      | -0.062<br>(0.652)      |
| Year fixed effect                         | Yes                                       | Yes                  | Yes                  | Yes                                        | Yes                  | Yes                  | Yes                      | Yes                    |
| Number of obs.                            | 50,763                                    | 50,759               | 50,657               | 23,177                                     | 23,132               | 22,489               | 50,843                   | 50,843                 |
| Adjusted R <sup>2</sup>                   | 0.031                                     | 0.014                | 0.023                | 0.005                                      | 0.006                | 0.006                | 0.081                    | 0.085                  |

**Table AX. Individual Investors’ Pseudo-Superstition Index, Market Return, and the Buy Ratio and Buy-sell Ratio – Quintile Analysis**

In this table we report the Buy Ratio and Buy-sell Ratio for individual investors with various pseudo-superstition indices and under different market returns. We first sort individual investors into quintiles by the pseudo superstition index in one year. Investors in quintile 5 (Q5) of the pseudo-superstitious index are the most pseudo superstitious. We then sort the trading days of the next year into quintiles based on the daily market returns. Market returns on trading days in Quintile-5 (M5) are the highest. We then compute the average Buy Ratio and average Buy-Sell Ratio of each product (MXF or TXF orders that expire in one month, two months, three months, six months, nine months, or one year) for the investors in each pseudo superstitious quintile and market return quintile. We define  $SI_{i,t-1}$  as the difference between limit order submission ratios at “7” and “3” for investor  $i$  in year  $t-1$ . We calculate the investor’s submission ratio at “7” as the number of limit orders submitted at prices ending with “7” divided by the total number of limit orders submitted at all prices within a year. The submission ratio at “3” is calculated in a similar fashion. The Buy Ratio is calculated as the number of buy contracts (taking long positions) scaled by total number of executed contracts. We calculate the Buy-sell Ratio as the difference between the numbers of buy and sell contracts, divided by their average. Both limit and market orders are included in the calculation of Buy Ratio and Buy-sell Ratio. Standard errors are adjusted for heteroskedasticity. To ensure a reasonable magnitude of the superstition index, we require that investors submit at least 10 limit orders in each of two consecutive years. The Satterthwaite p-value assumes unequal variances of investor performance in quintiles 1 and 5. \*, \*\*, and \*\*\* indicate significance levels of 0.1, 0.05, and 0.01, respectively.

Panel A: Buy Ratio

| Quintile Ranks of<br>Market Returns | Quintile Ranks of Pseudo $SI_{i,t-1}$ |           |           |           |           | Diff (Q5-Q1) | p-value |
|-------------------------------------|---------------------------------------|-----------|-----------|-----------|-----------|--------------|---------|
|                                     | Q1                                    | Q2        | Q3        | Q4        | Q5        |              |         |
| M1                                  | 0.705                                 | 0.679     | 0.673     | 0.668     | 0.698     | -0.007       | 0.369   |
| M2                                  | 0.628                                 | 0.613     | 0.616     | 0.608     | 0.626     | -0.002       | 0.261   |
| M3                                  | 0.587                                 | 0.578     | 0.579     | 0.573     | 0.579     | -0.008       | 0.352   |
| M4                                  | 0.552                                 | 0.553     | 0.553     | 0.548     | 0.546     | -0.007       | 0.256   |
| M5                                  | 0.529                                 | 0.537     | 0.544     | 0.535     | 0.526     | -0.003       | 0.165   |
| Diff (M5-M1)                        | -0.176***                             | -0.142*** | -0.129*** | -0.133*** | -0.172*** |              |         |
| p-value                             | 0.000                                 | 0.000     | 0.000     | 0.000     | 0.000     |              |         |

Panel B: Buy-Sell Ratio

| Quintile Ranks of<br>Market Returns | Quintile Ranks of Pseudo $SI_{i,t-1}$ |           |           |           |           | Diff (Q5-Q1) | p-value |
|-------------------------------------|---------------------------------------|-----------|-----------|-----------|-----------|--------------|---------|
|                                     | Q1                                    | Q2        | Q3        | Q4        | Q5        |              |         |
| M1                                  | 0.820                                 | 0.717     | 0.691     | 0.670     | 0.792     | -0.028       | 0.103   |
| M2                                  | 0.513                                 | 0.452     | 0.463     | 0.430     | 0.504     | -0.009       | 0.261   |
| M3                                  | 0.347                                 | 0.312     | 0.318     | 0.292     | 0.315     | -0.033       | 0.105   |
| M4                                  | 0.209                                 | 0.212     | 0.214     | 0.193     | 0.182     | -0.027       | 0.101   |
| M5                                  | 0.117                                 | 0.149     | 0.176     | 0.138     | 0.106     | -0.012       | 0.165   |
| Diff (M5-M1)                        | -0.702***                             | -0.568*** | -0.515*** | -0.532*** | -0.686*** |              |         |
| p-value                             | 0.000                                 | 0.000     | 0.000     | 0.000     | 0.000     |              |         |

**o-Table AXI. Individual Investors' Time-to-Execution/Time-to-Cancellation and Investment Performance**

In this table we report the parameter estimates for the following panel regression:

$$Return_{i,t} = \alpha + \beta_1 TimeToExecution_{i,t} \text{ (or } TimeToCancellation_{i,t}) + \beta_2 OrderSize_{i,t-1} + \beta_3 SubRatio_{0 \text{ and } 5,i,t-1} + \beta_4 Ln(N_{i,t-1}) + \beta_5 Disposition_{i,t-1} + \beta_6 Return_{i,t-1} + \varepsilon_{i,t}$$

where  $Return_{i,t}$  and  $Return_{i,t-1}$  are the average mark-to-market returns or round-trip performance for investor  $i$  in year  $t$  and year  $t-1$ .  $TimeToExecution_{i,t}$  is the interval from order submission to execution for executed limit orders for investor  $i$  in year  $t$ .  $TimeToCancellation_{i,t}$  is the interval from submission to cancellation for orders that are submitted and then deleted by investor  $i$  in year  $t$ .  $OrderSize_{i,t-1}$  is the average number of contracts per limit order submitted by investor  $i$  in year  $t-1$ .  $SubRatio_{0 \text{ and } 5,i,t-1}$  is the sum of investor  $i$ 's submission ratios at prices ending with "0" and "5" in year  $t-1$ .  $Ln(N_{i,t-1})$  is the log of number of limit orders submitted by investor  $i$  in the previous year.  $Disposition_{i,t-1}$  is the difference between the durations of losing and winning round-trip trades of investor  $i$  in year  $t-1$ , divided by their average. Mark-to-market return of limit (market) orders is the return under the assumption that the initiating limit (market) orders are covered at the closing price of a trading day. The round-trip daily profit and daily index return are calculated as the average round-trip profit or index return divided by the average round-trip duration for each investor. Standard errors are adjusted for heteroskedasticity. To ensure a reasonable magnitude of the superstition index, we require that investors submit at least 10 limit orders in each of two consecutive years. \*, \*\*, and \*\*\* indicate significance levels of 0.1, 0.05, and 0.01, respectively.

Panel A. Time-to-Execution

| Independent Variable                  | Mark-to-market Return of Limit Orders (%) |                      |                      | Mark-to-market Return of Market Orders (%) |                      |                     | Round-trip Performance |                        |
|---------------------------------------|-------------------------------------------|----------------------|----------------------|--------------------------------------------|----------------------|---------------------|------------------------|------------------------|
|                                       | Intraday                                  | 1-day                | 5-day                | Intraday                                   | 1-day                | 5-day               | Daily profit (TWD)     | Daily index return (%) |
| $TimeToExecution_{i,t}$               | -0.029***<br>(0.000)                      | -0.038***<br>(0.000) | -0.043***<br>(0.000) | -0.019***<br>(0.000)                       | -0.021**<br>(0.015)  | -0.006<br>(0.716)   | -17,251.539<br>(0.307) | -1.390<br>(0.310)      |
| $OrderSize_{i,t-1}$                   | 0.001**<br>(0.011)                        | 0.000<br>(0.665)     | -0.002<br>(0.477)    | 0.002<br>(0.125)                           | 0.002<br>(0.338)     | -0.001<br>(0.790)   | -1,711.001<br>(0.190)  | -0.119<br>(0.244)      |
| $SubRatio_{0 \text{ and } 5, i, t-1}$ | -0.020***<br>(0.000)                      | -0.052***<br>(0.000) | -0.134***<br>(0.000) | -0.033***<br>(0.006)                       | -0.092***<br>(0.000) | -0.125**<br>(0.018) | 48,778.242<br>(0.324)  | 3.970<br>(0.322)       |
| $Ln(N_{i,t-1})$                       | 0.010***<br>(0.000)                       | 0.013***<br>(0.000)  | 0.007*<br>(0.086)    | 0.012***<br>(0.000)                        | 0.017***<br>(0.001)  | 0.010<br>(0.286)    | 3,507.781<br>(0.296)   | 0.286<br>(0.289)       |
| $Disposition_{i,-1}$                  | -0.021***<br>(0.000)                      | -0.030***<br>(0.000) | -0.018**<br>(0.012)  | -0.021***<br>(0.000)                       | -0.038***<br>(0.000) | -0.040**<br>(0.027) | 18,288.088<br>(0.272)  | 1.487<br>(0.272)       |
| $Return_{i,t-1}$                      | 0.064***<br>(0.000)                       | 0.030***<br>(0.000)  | 0.025***<br>(0.000)  | 0.010<br>(0.258)                           | 0.002<br>(0.860)     | 0.012<br>(0.210)    | 0.636***<br>(0.000)    | 0.644***<br>(0.001)    |
| Constant                              | -0.045***<br>(0.000)                      | -0.078***<br>(0.000) | -0.039<br>(0.136)    | -0.044***<br>(0.002)                       | -0.053*<br>(0.082)   | -0.065<br>(0.293)   | -124.241<br>(0.957)    | -0.064<br>(0.686)      |
| Year fixed effect                     | Yes                                       | Yes                  | Yes                  | Yes                                        | Yes                  | Yes                 | Yes                    | Yes                    |
| Number of obs.                        | 56,952                                    | 56,947               | 56,808               | 25,735                                     | 25,685               | 24,974              | 56,843                 | 56,843                 |
| Adjusted R <sup>2</sup>               | 0.034                                     | 0.012                | 0.015                | 0.007                                      | 0.005                | 0.003               | 0.000                  | 0.000                  |

Panel B. Time-to-Cancellation

| Independent Variable                  | Mark-to-market Return of Limit Orders (%) |                      |                      | Mark-to-market Return of Market Orders (%) |                      |                      | Round-trip Performance |                        |
|---------------------------------------|-------------------------------------------|----------------------|----------------------|--------------------------------------------|----------------------|----------------------|------------------------|------------------------|
|                                       | Intraday                                  | 1-day                | 5-day                | Intraday                                   | 1-day                | 5-day                | Daily profit (TWD)     | Daily index return (%) |
| $TimeToCancellation_{i,t}$            | -0.008***<br>(0.000)                      | -0.011***<br>(0.000) | -0.011***<br>(0.001) | -0.006***<br>(0.000)                       | -0.013***<br>(0.000) | -0.024***<br>(0.001) | 38.063<br>(0.847)      | 0.006<br>(0.706)       |
| $OrderSize_{i,t-1}$                   | 0.001**<br>(0.017)                        | 0.000<br>(0.718)     | -0.001<br>(0.523)    | 0.002*<br>(0.079)                          | 0.002<br>(0.304)     | -0.001<br>(0.837)    | -772.719<br>(0.287)    | -0.039<br>(0.445)      |
| $SubRatio_{0 \text{ and } 5, i, t-1}$ | -0.032***<br>(0.000)                      | -0.066***<br>(0.000) | -0.148***<br>(0.000) | -0.037***<br>(0.002)                       | -0.082***<br>(0.002) | -0.079<br>(0.139)    | -1,430.179<br>(0.168)  | -0.095<br>(0.203)      |
| $Ln(N_{i,t-1})$                       | 0.009***<br>(0.000)                       | 0.011***<br>(0.000)  | 0.004<br>(0.358)     | 0.010***<br>(0.000)                        | 0.013***<br>(0.007)  | 0.004<br>(0.644)     | 161.475<br>(0.683)     | 0.016<br>(0.611)       |
| $Disposition_{i,t-1}$                 | -0.022***<br>(0.000)                      | -0.031***<br>(0.000) | -0.020***<br>(0.008) | -0.020***<br>(0.000)                       | -0.034***<br>(0.000) | -0.030*<br>(0.097)   | 1,363.819*<br>(0.068)  | 0.118*<br>(0.078)      |
| $Return_{i,t-1}$                      | 0.066***<br>(0.000)                       | 0.029***<br>(0.000)  | 0.023***<br>(0.000)  | 0.009<br>(0.315)                           | 0.001<br>(0.957)     | 0.009<br>(0.373)     | 0.562***<br>(0.001)    | 0.575***<br>(0.003)    |
| Constant                              | -0.036***<br>(0.000)                      | -0.062***<br>(0.000) | -0.019<br>(0.485)    | -0.031**<br>(0.033)                        | -0.028<br>(0.371)    | -0.022<br>(0.733)    | 1,322.681<br>(0.526)   | 0.041<br>(0.771)       |
| Year fixed effect                     | Yes                                       | Yes                  | Yes                  | Yes                                        | Yes                  | Yes                  | Yes                    | Yes                    |
| Number of obs.                        | 55,372                                    | 55,367               | 55,234               | 25,271                                     | 25,223               | 24,521               | 55,312                 | 55,312                 |
| Adjusted R <sup>2</sup>               | 0.032                                     | 0.011                | 0.014                | 0.006                                      | 0.004                | 0.003                | 0.071                  | 0.078                  |

## Appendix Table AXII. Investors' Learning and Superstition

In this table we report the parameter estimates from the following regression for individual investors:

$$\begin{aligned}
 SI_{i,t} - SI_{i,t-1} = & \alpha + \beta_1 \ln(N_{i,t-k}) + \beta_2 \text{Return}_{8,i,t-1} + \beta_3 \text{Return}_{4,i,t-1} + \beta_4 \text{Return}_{\text{other},i,t-1} \\
 & + \beta_5 \text{Return}_{\text{market},i,t-1} + \beta_6 SI_{i,t-1} + \beta_7 \text{OrderSize}_{i,t-1} + \beta_8 \text{SubRatio}_{0 \text{ and } 5,i,t-1} \\
 & + \beta_9 \text{Disposition}_{i,t-1} + \varepsilon_{i,t}
 \end{aligned}$$

where  $SI_{i,t}$  and  $SI_{i,t-1}$  are the superstition indices for investor  $i$  in years  $t$  and  $t-1$ , and are calculated as the difference between limit order submission ratios at “8” and “4” in each year. We calculate the investor’s submission ratio at “8” as the number of limit orders submitted at prices ending with “8” divided by the total number of limit orders submitted at all prices within a year. The submission ratio at “4” is calculated in a similar fashion.  $\ln(N_{i,t-k})$  is the log of the number of limit orders submitted by investor  $i$  in year  $t-k$  ( $k$  is an integer that ranges from 1 to 3).  $\text{Return}_{8,i,t-1}$  is the mark-to-market intraday return of limit orders submitted by investor  $i$  at prices ending with “8” in year  $t-1$ .  $\text{Return}_{4,i,t-1}$  is the mark-to-market intraday return of limit orders submitted by investor  $i$  at prices ending with “4” in year  $t-1$ .  $\text{Return}_{\text{others},i,t-1}$  is the mark-to-market intraday return of limit orders submitted by investor  $i$  at prices ending with other numbers in year  $t-1$ .  $\text{Return}_{\text{market},i,t-1}$  is the mark-to-market intraday return of market orders submitted by investor  $i$  in year  $t-1$ .  $\text{OrderSize}_{i,t-1}$  is the average number of contracts per limit order submitted by investor  $i$  in year  $t-1$ .  $\text{SubRatio}_{0 \text{ and } 5,i,t-1}$  is the sum of investor  $i$ ’s submission ratios at prices ending with “0” and “5” in year  $t-1$ .  $\text{Disposition}_{i,t-1}$  is the disposition effect, which is calculated as the difference between the durations of losing and winning round-trip trades of investor  $i$  in year  $t-1$ , divided by their average. We express the superstition index in percentage. In models 1 and 4, we require that investors submit at least 10 limit orders in each of the two consecutive years. Standard errors are adjusted for heteroskedasticity. In models 2 and 5, we require that investors must submit at least 10 limit orders in each of three consecutive years. In models 3 and 6, we require that investors submit at least 10 limit orders in each of four consecutive years. \*, \*\*, and \*\*\* indicate significance levels of 0.1, 0.05, and 0.01, respectively.

| Independent Variables               | $SI_{i,t} - SI_{i,t-1}$ (%) |                      |                      |                      |                      |                      |
|-------------------------------------|-----------------------------|----------------------|----------------------|----------------------|----------------------|----------------------|
|                                     | Model 1                     | Model 2              | Model 3              | Model 4              | Model 5              | Model 6              |
| $Ln(N_{i,t-1})$                     | -0.096***<br>(0.000)        |                      |                      | -0.188***<br>(0.000) |                      |                      |
| $Ln(N_{i,t-2})$                     |                             | -0.075***<br>(0.003) |                      |                      | -0.093***<br>(0.009) |                      |
| $Ln(N_{i,t-3})$                     |                             |                      | 0.001<br>(0.976)     |                      |                      | -0.082<br>(0.127)    |
| $Return_{8,i,t-1}$ (%)              |                             |                      |                      | -0.103<br>(0.343)    | -0.111<br>(0.306)    | -0.133<br>(0.478)    |
| $Return_{4,i,t-1}$ (%)              |                             |                      |                      | -0.052<br>(0.602)    | -0.055<br>(0.577)    | -0.002<br>(0.989)    |
| $Return_{other,i,t-1}$ (%)          |                             |                      |                      | -0.767**<br>(0.018)  | -0.858***<br>(0.008) | -0.692<br>(0.185)    |
| $Return_{market,i,t-1}$ (%)         |                             |                      |                      | 0.032<br>(0.772)     | 0.020<br>(0.856)     | 0.075<br>(0.683)     |
| $SI_{i,t-1}$ (%)                    | -0.434***<br>(0.000)        | -0.434***<br>(0.000) | -0.391***<br>(0.000) | -0.333***<br>(0.000) | -0.333***<br>(0.000) | -0.270***<br>(0.000) |
| $OrderSize_{i,t-1}$                 | -0.047***<br>(0.000)        | -0.049***<br>(0.000) | -0.035**<br>(0.031)  | -0.013<br>(0.293)    | -0.019<br>(0.125)    | -0.023<br>(0.173)    |
| $SubRatio_{0 \text{ and } 5,i,t-1}$ | -0.932***<br>(0.000)        | -0.884***<br>(0.000) | -1.512***<br>(0.000) | -0.017<br>(0.940)    | 0.044<br>(0.844)     | -0.832**<br>(0.011)  |
| $Disposition_{i,t-1}$               | 0.279***<br>(0.000)         | 0.276***<br>(0.000)  | 0.340***<br>(0.000)  | 0.207***<br>(0.003)  | 0.196***<br>(0.005)  | 0.204*<br>(0.060)    |
| Constant                            | 2.785***<br>(0.000)         | 2.634***<br>(0.000)  | 2.392***<br>(0.000)  | 2.274***<br>(0.000)  | 1.677***<br>(0.000)  | 2.050***<br>(0.000)  |
| Year fixed effect                   | Yes                         | Yes                  | Yes                  | Yes                  | Yes                  | Yes                  |
| Observations                        | 56,260                      | 56,260               | 24,388               | 22,298               | 22,298               | 9,404                |
| r2_a                                | 0.168                       | 0.168                | 0.153                | 0.090                | 0.089                | 0.069                |

**Figure A1. Limit Order Submission Ratios on Various Days of the Month**

In this figure, we report the proportion of limit orders submitted by investors on various dates in the month. The submission ratio is calculated as the number of limit orders submitted on each date of the month divided by the total number of limit orders submitted in the month. We report the figures separately for individual investors, domestic institutions, and Qualified Foreign Institutional Investors (QFIIs.)

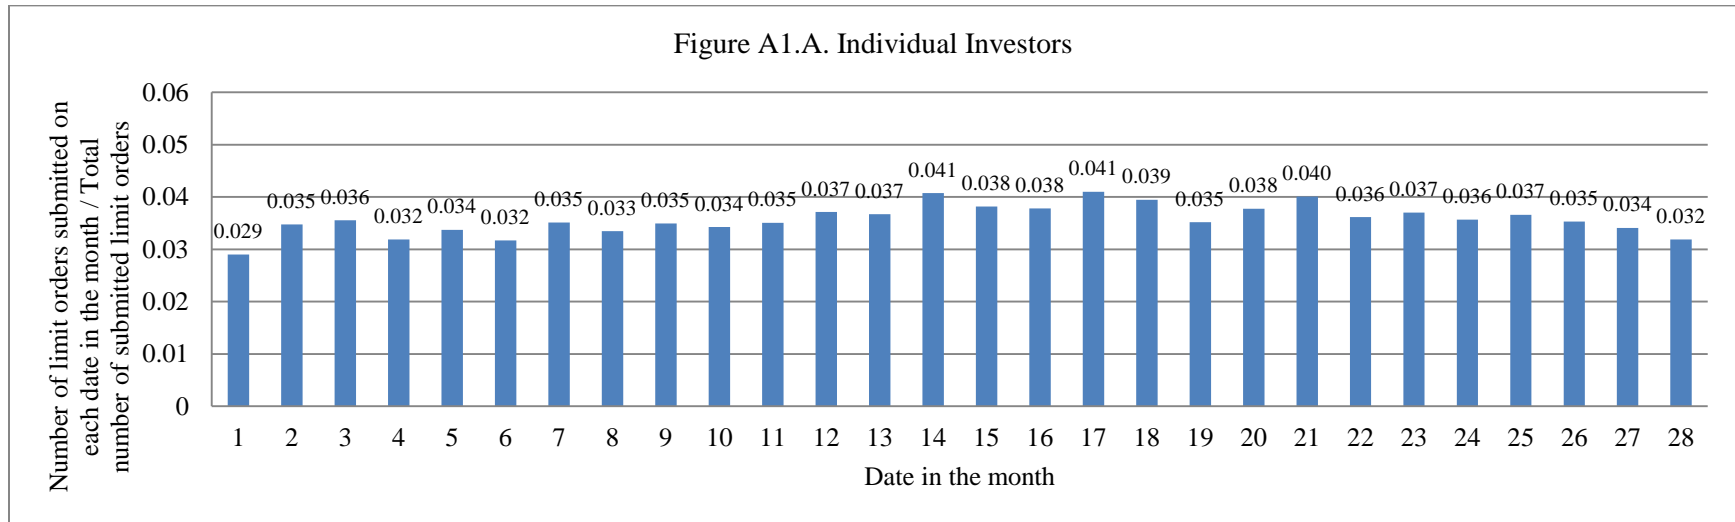

Figure A1.B. Domestic Institutions

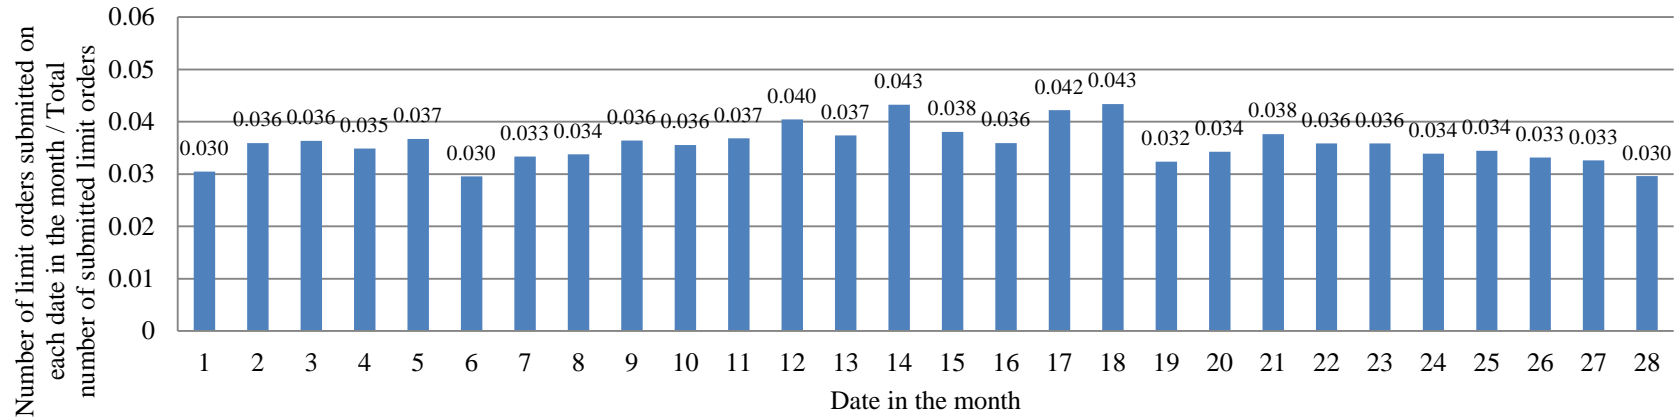

Figure A1.C. Qualified Foreign Institutional Investors

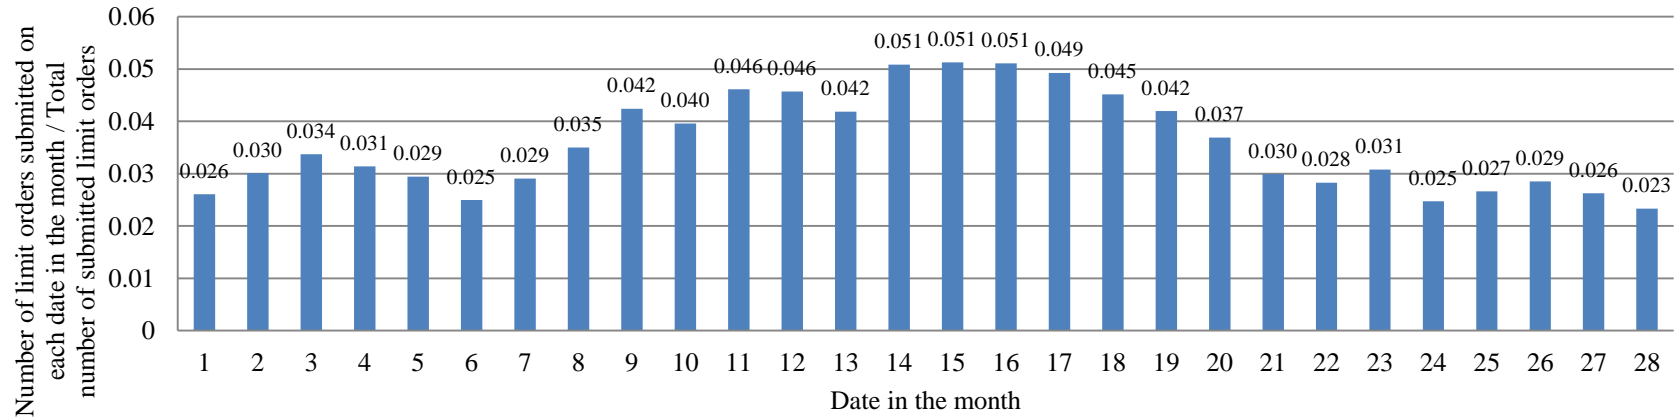

**Figure A2. Limit Order Submission Ratios at Various Prices for Limit Buy Orders**

In this figure, we report the proportion of limit buy orders submitted by investors at prices ending with “X” (X is an integer ranging from 0 to 9). The submission ratio is calculated as the number of limit buy orders submitted at “X” divided by the total number of submitted limit buy orders. We report the figures separately for individual investors, domestic institutions, and Qualified Foreign Institutional Investors (QFIIs.)

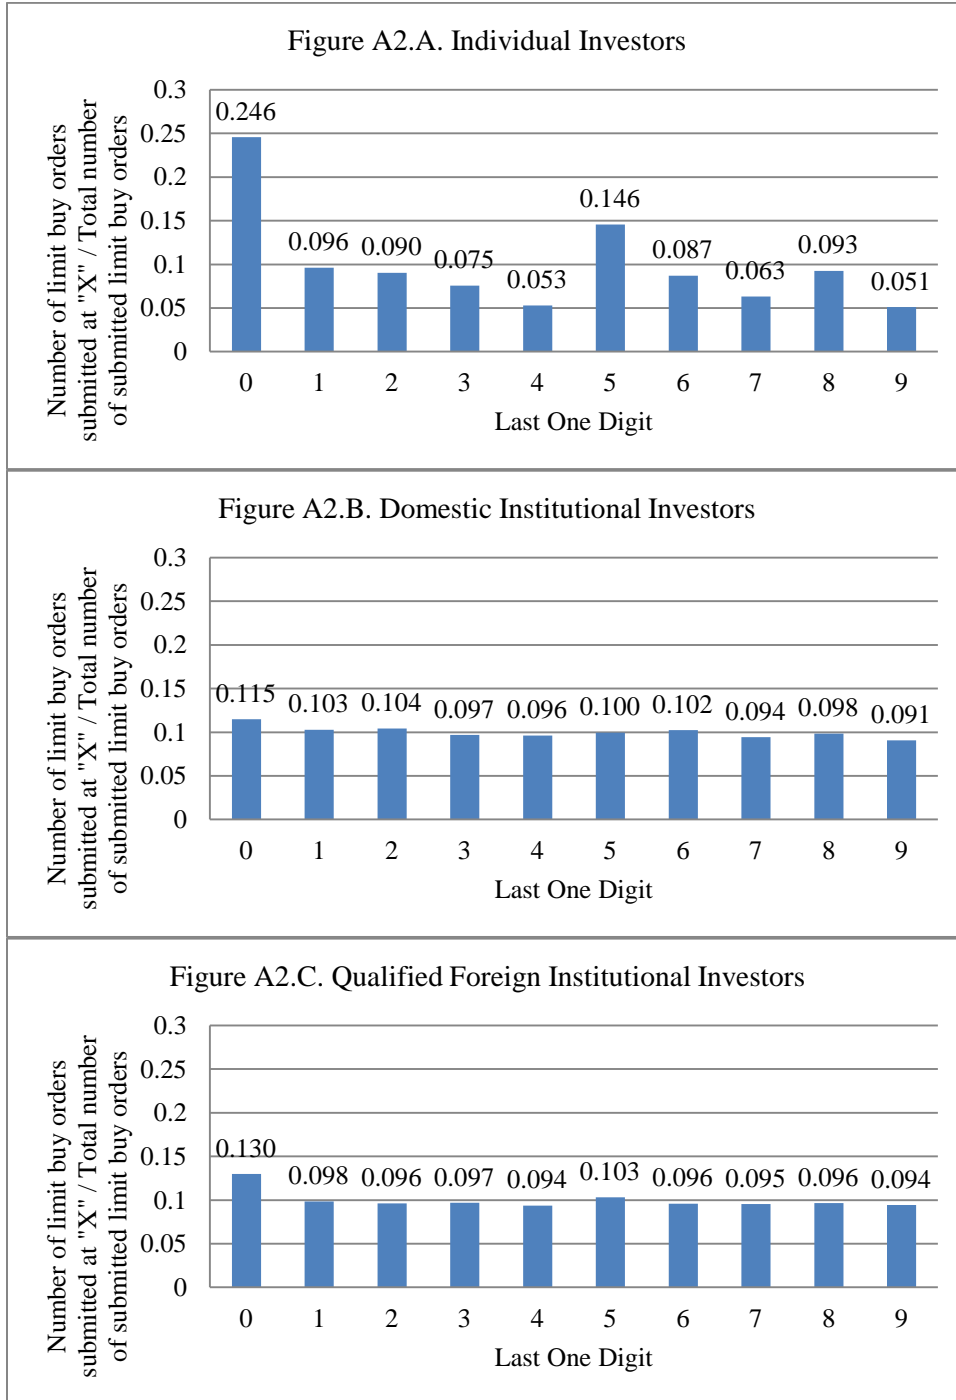

**Figure A3. Limit Order Submission Ratios at Various Prices for Limit Sell Orders**

In this figure, we report the proportion of limit sell orders submitted by investors at prices ending with “X” (X is an integer ranging from 0 to 9). The submission ratio is calculated as the number of limit sell orders submitted at “X” divided by the total number of submitted limit sell orders. We report the figures separately for individual investors, domestic institutions, and Qualified Foreign Institutional Investors (QFIIs.)

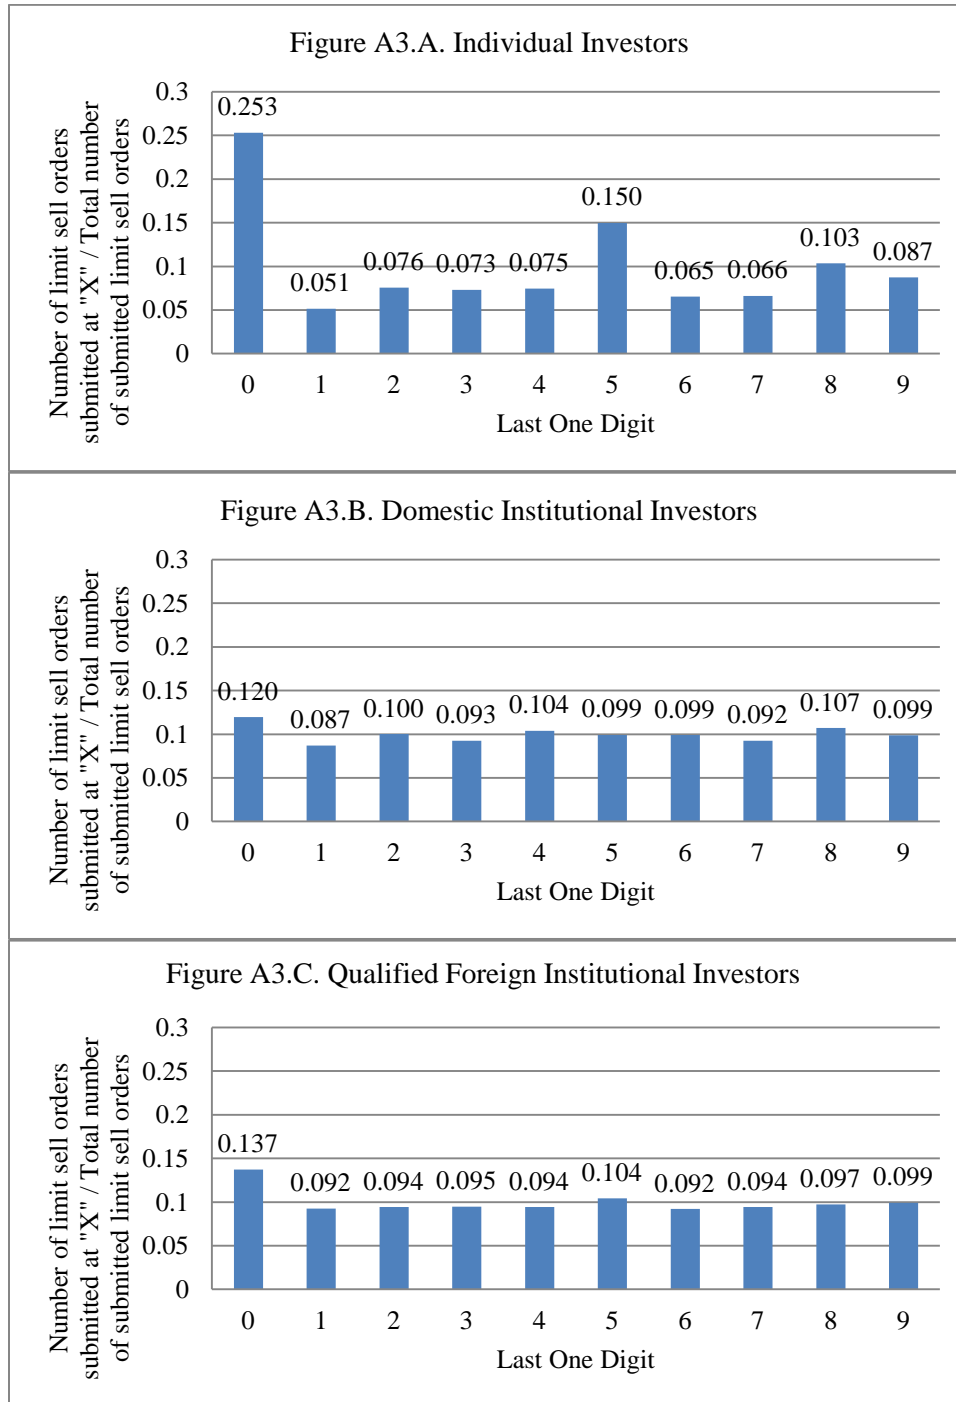

**Figure A4. Superstition and Intraday Returns of Limit Orders Submitted at “X”**

In this figure, we sort investors into quintiles by the superstition index in one year, and plot the mark-to-market return of limit orders submitted at prices ending with “X” in the subsequent year (X is an integer ranging from 0 to 9). Quintile-5 (Q5) investors are more superstitious. In each year, we calculate the superstition index for each investor as the difference between limit order submission ratios at “8” and “4.” The submission ratio at “8” of an investor is calculated as the number of limit orders submitted at prices ending with “8” divided by the total number of limit orders submitted at all prices within a year. The submission ratio at “4” is calculated in a similar fashion. Mark-to-market intraday return is the difference between the trade price and the daily closing price divided by the trade price. Results for individual investors, domestic institutions, and Qualified Foreign Institutional Investors (QFIIs) are reported separately.

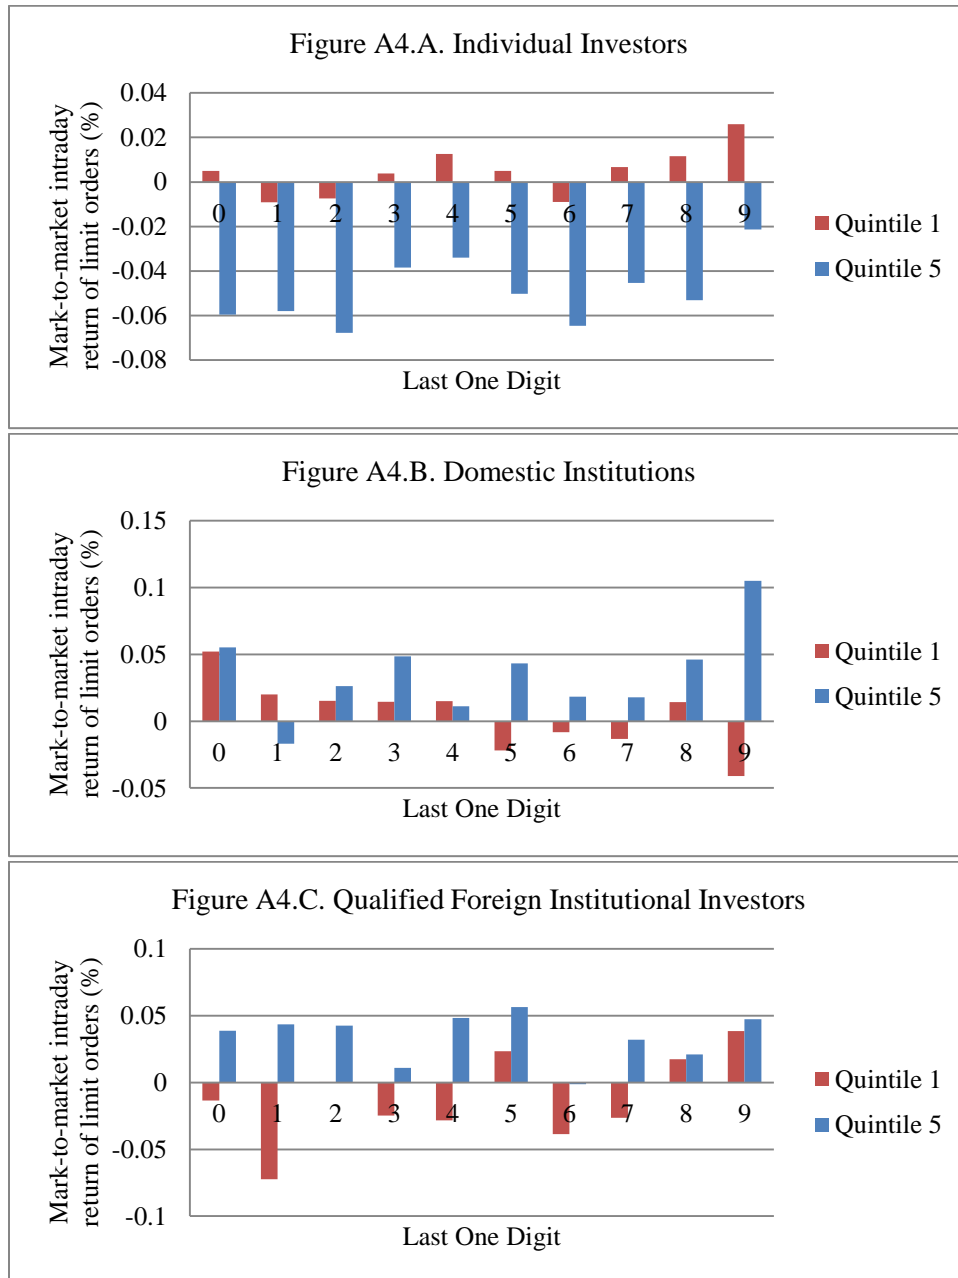

**Figure A5. Intraday Returns of Institutional Investors When They Pick Up Limit Orders Submitted by Individual Investors at “X”**

In this figure, we plot the returns of institutional investors when they pick up the limit orders submitted by individual investors. We first sort individual investors into quintiles by the superstition index in one year, and group their limit orders in the subsequent year into ten groups according to the last digit of limit order prices. The Quintile-5 individual investors are the most superstitious. We then identify the individual limit orders that are picked up by institutional investors. The intraday mark-to-market returns of institutional investors are calculated separately for those orders that have picked up the limit orders submitted by the Quintile-5 and Quintile-1 individual investors, and for each of the last one digit. In each year, we calculate the superstition index for each investor as the difference between limit order submission ratios at “8” and “4.” The submission ratio at “8” of an investor is calculated as the number of limit orders submitted at prices ending with “8” divided by the total number of limit orders submitted at all prices within a year. The submission ratio at “4” is calculated in a similar fashion. Mark-to-market intraday return of institutional investors is the difference between the trade price and the daily closing price divided by the trade price. Results for domestic institutions and Qualified Foreign Institutional Investors (QFIIs) are shown in figures A5.A and A5.B, respectively.

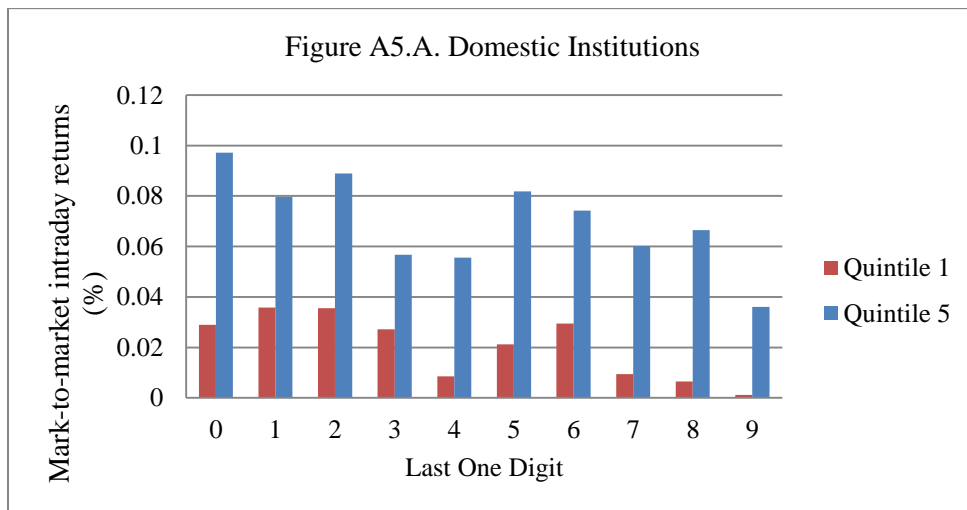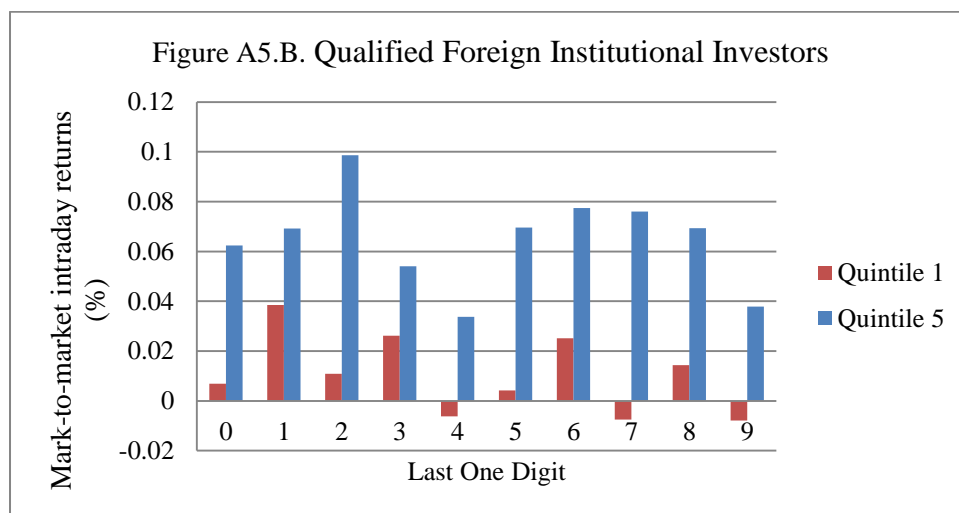

Supplement: mnsc.2016.2701-sm.pdf [file mnsc.2016.2701-sm.pdf]
